# Supplementary material for: Deficiency in class III PI3-kinase confers postnatal lethality with IBD-like features in zebrafish
Source: PubMed Central journal article supplement (PMC6035235; doi:10.1038/s41467-018-05105-8), 2018-07-06
Supplement: 41467_2018_5105_MOESM1_ESM.pdf [file 41467_2018_5105_MOESM1_ESM.pdf]

## **Supplementary Information**

**Deficiency in class III PI3-kinase confers postnatal lethality  
with IBD-like features in zebrafish**

**Zhao et al., 2018**

Supplementary Figure 1

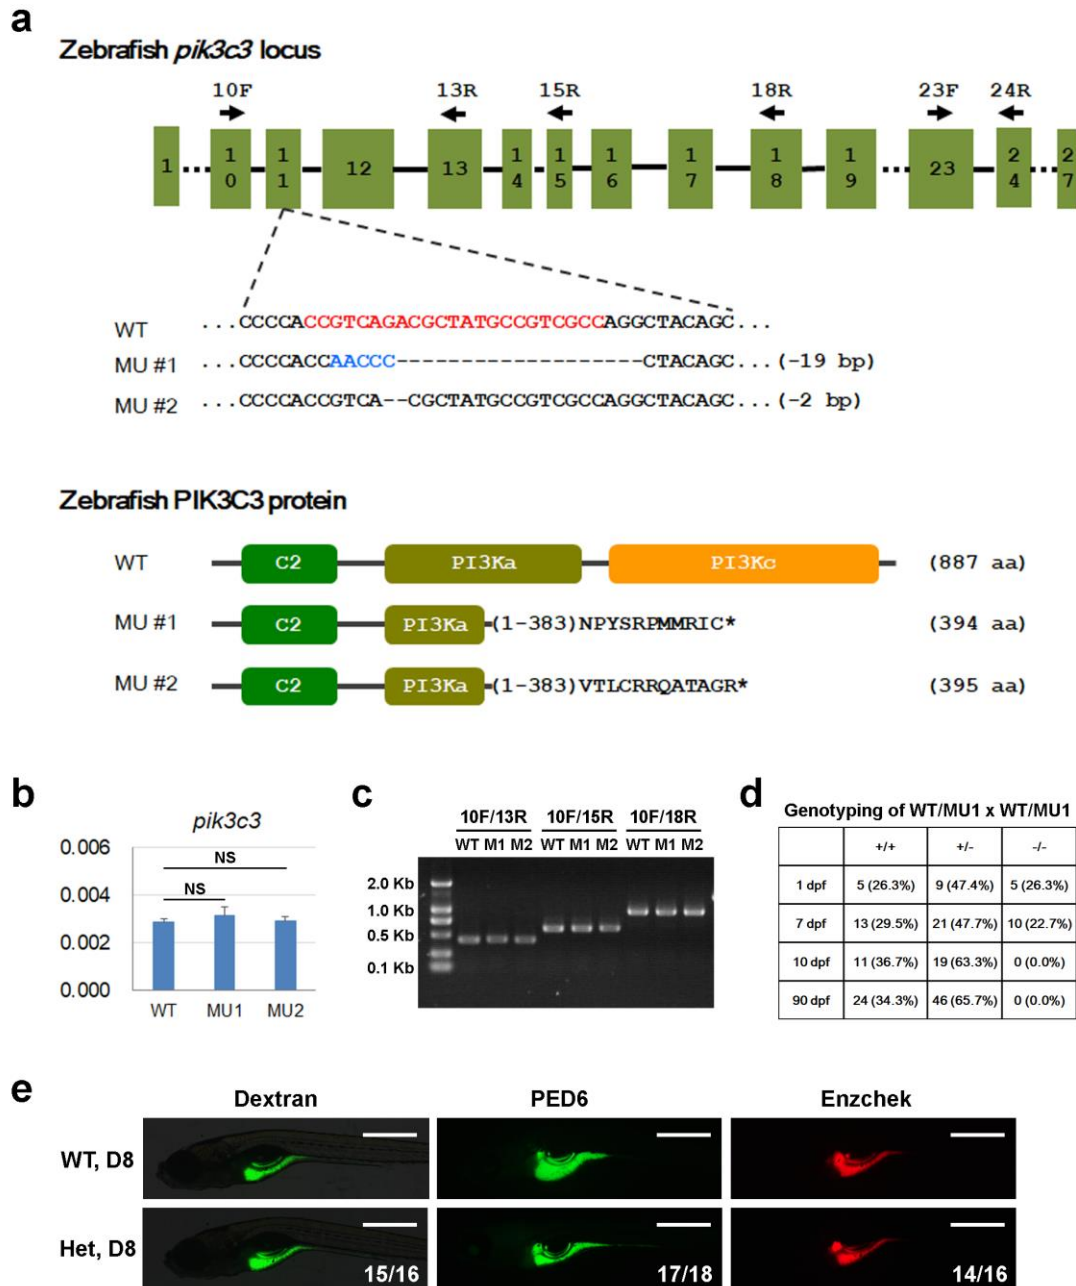

**Supplementary Figure1** PIK3C3 knockout in zebrafish. (a) Crispr/Cas9 mediated knockout of *pik3c3*. gRNA targeting sequence in exon 11 is highlighted in red. We recovered two stably transmitted mutant alleles and they are predicted to produce truncated proteins of 394 and 395 aa respectively. (b) qPCR analysis with primers 23F/24R reveals that WT and mutant RNAs are expressed at similar levels. *gapdh* is the internal control and data represent mean  $\pm$ SD from

three independent repeats. NS, non-significant in one-way ANOVA with Dunnett's Multiple Comparison. (c) RT-PCR with the indicated primer pairs generate only one band in each mutant, indicating mutant RNAs are spliced normally. (d) Genotyping results of WT, heterozygote and mutant at the indicated stages. (e) The digestive activities in heterozygous embryos are normal at 8 dpf as revealed by Dextran, PED6 and Enzchek staining. Assays were performed as described in Fig. 1b.

## Supplementary Figure 2

### GO analysis: downregulated in mutant

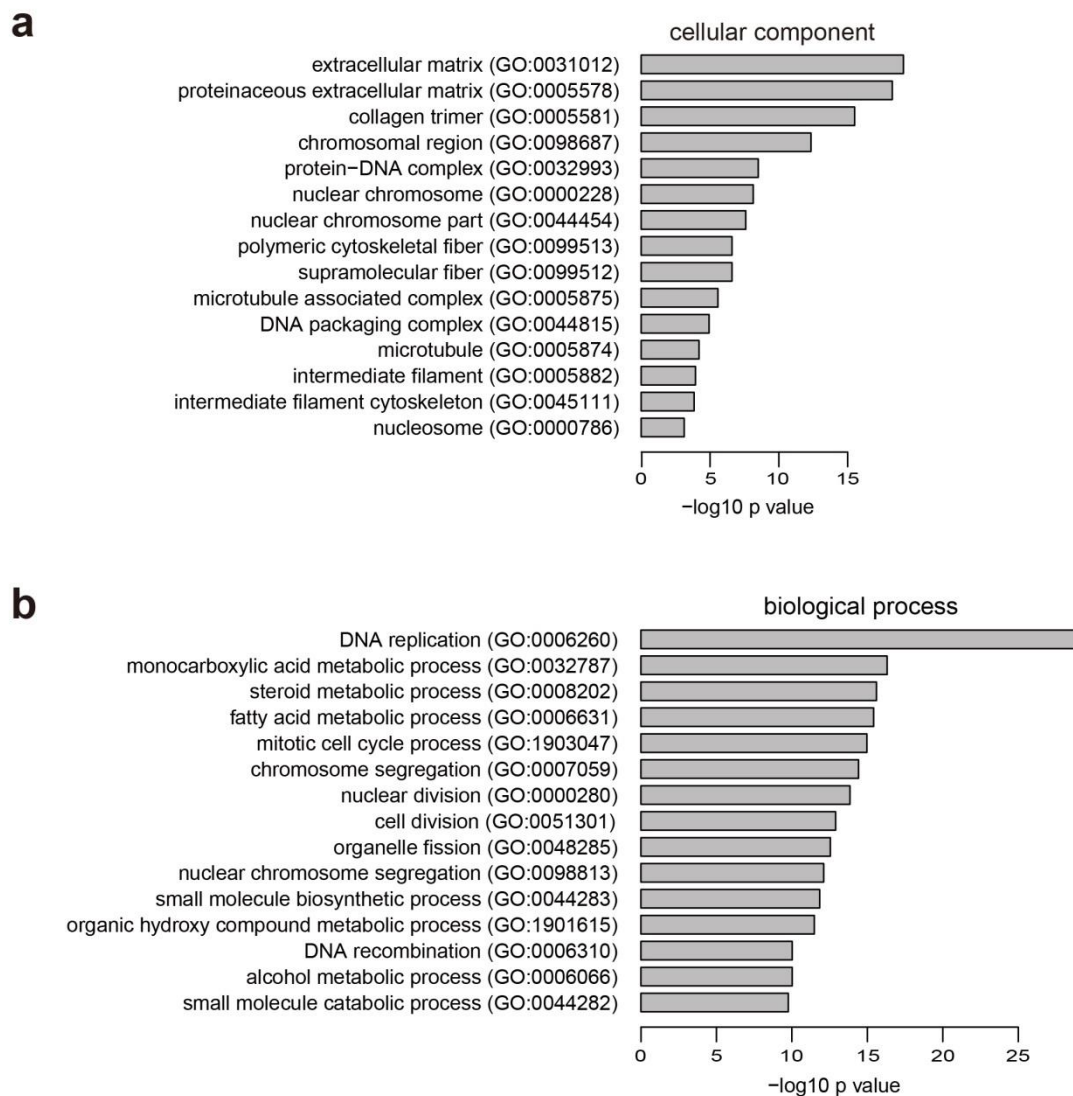

**Supplementary Figure 2** Gene ontology analysis. **(a)** Cellular components down-regulated in *pik3c3* mutants at 8 dpf. Extracellular matrix related genes are dramatically suppressed in the mutants. **(b)** Biological processes down-regulated in *pik3c3* mutants at 8 dpf. DNA replication and metabolic processes associated with liver or gut are compromised in the mutants.

Supplementary Figure 3

GO analysis: upregulated in mutant

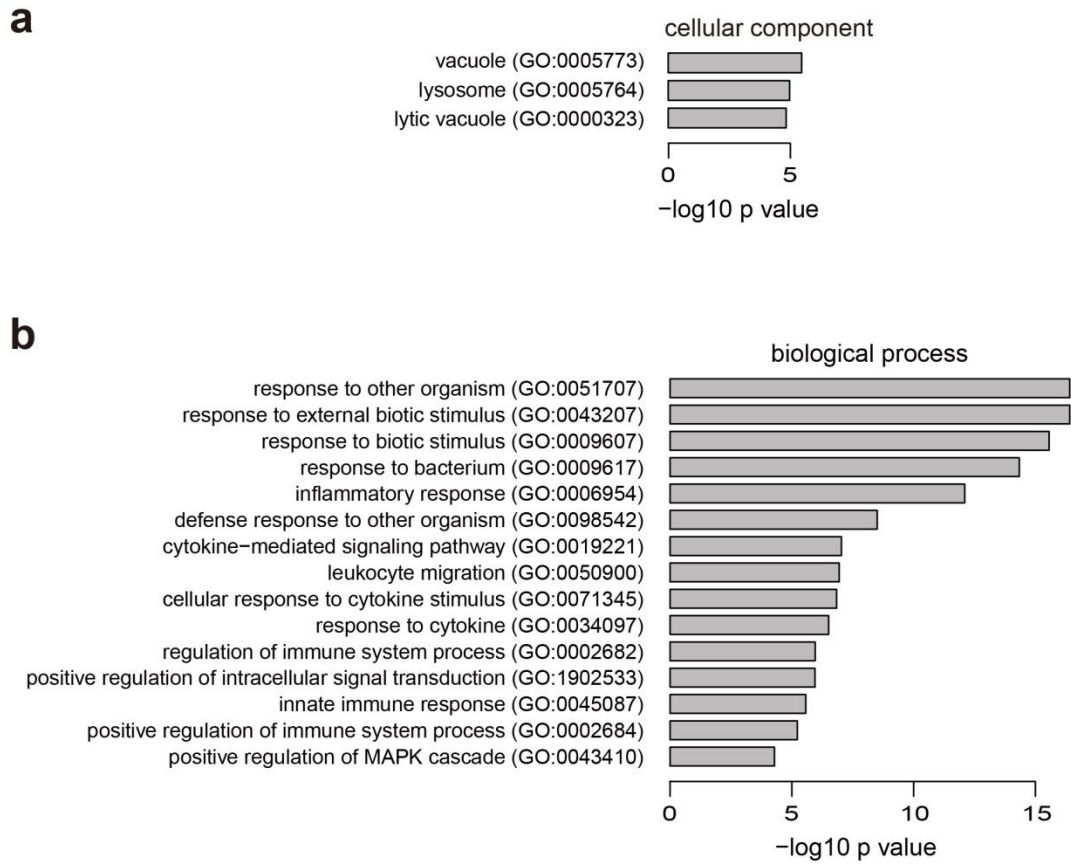

Supplementary Figure 3 Gene ontology analysis for cellular components or biological

processes up-regulated in *pik3c3* mutants at 8 dpf. Inflammation and innate immune response

are the major biological processes stimulated in the mutants.

## Supplementary Figure 4

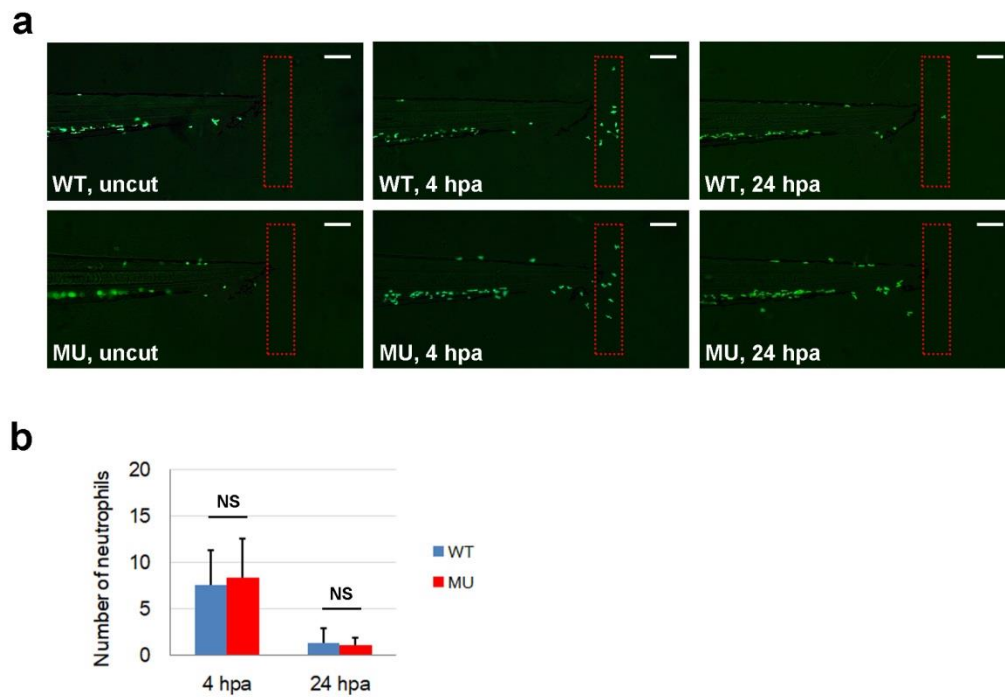

**Supplementary Figure 4** Migration of mpx-GFP cells after tailfin amputation in control sibling and *pik3c3* mutant embryos. **(a)** Representative distributions of mpx-GFP cells in uncut, 4 or 24 hrs post amputation (hpa) embryos. Scale bars, 100  $\mu$ m. **(b)** Average numbers of mpx-GFP cells in the outlined tail regions in (a). Data represent mean  $\pm$ SD of 17 (for WT) or 13 (for MU) embryos. *p*-value calculated by one-way ANOVA with Tukey's Multiple Comparison (NS, non-significant).

### Supplementary Figure 5

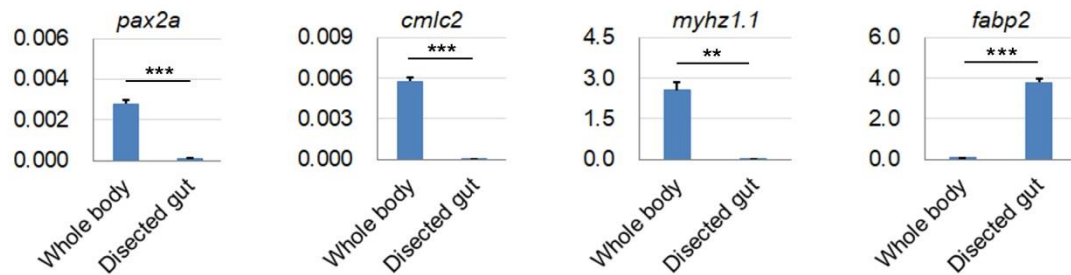

**Supplementary Figure 5** qRT-PCR analysis of gene expression levels in whole embryo or dissected gut of 8 dpf. *pax2a* (*paired box 2a*) is a neuronal and pronephric duct expressed gene, *cmlc2* (*cardiac myosin, light chain 7*) and *myhz1.1* (*myosin, heavy polypeptide 1.1*) are cardiac and skeletal muscle markers, *fabp2* (*fatty acid binding protein 2*) is intestinal marker. Data are normalized to *actb1* and represent mean  $\pm$ SD from three independent repeats. *p*-value determined by unpaired two-tailed Student's t-test (\*\* $p < 0.01$ ; \*\*\* $p < 0.001$ ).

## Supplementary Figure 6

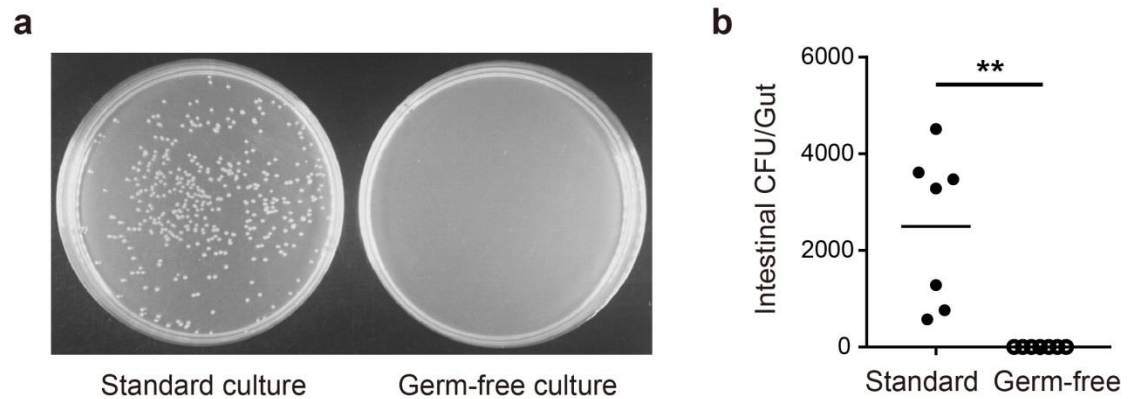

**Supplementary Figure 6** Analysis of intestinal bacteria of embryos cultured under either standard or germ-free conditions. **(a)** A represent image of gut homogenate derived bacterial colony on LB agar plate. **(b)** Quantification of (a). Each dot represents the number of colony derived from one gut homogenate. The numbers of colony vary from hundreds to thousands for 8 dpf embryos under standard culture condition while no colony is detected under germ-free condition (\*\* $p < 0.01$  by unpaired two-tailed Student's t-test).



Supplementary Figure 7

a

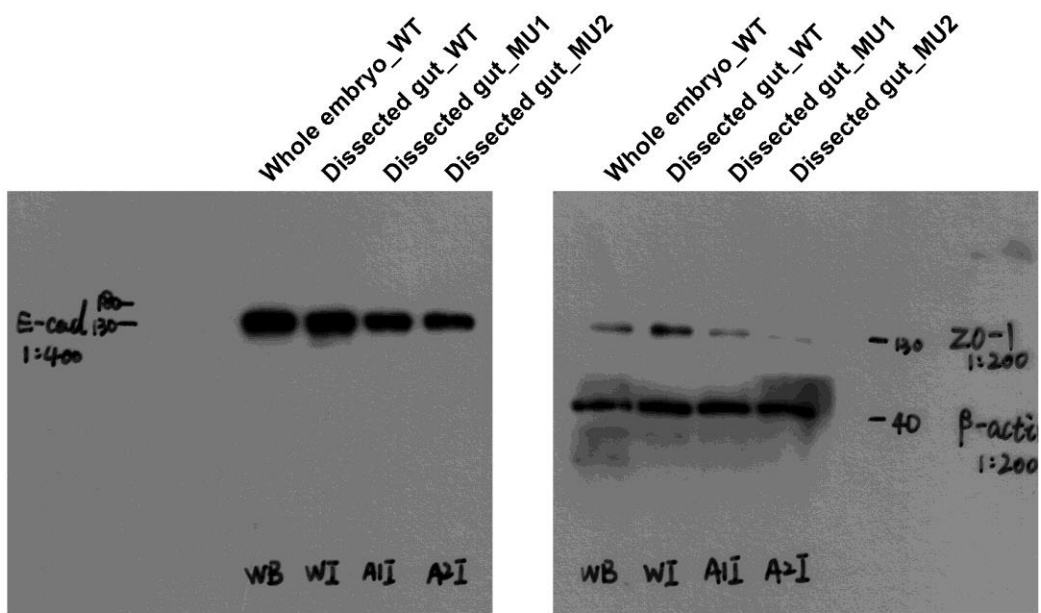

(for Figure 6b)

b

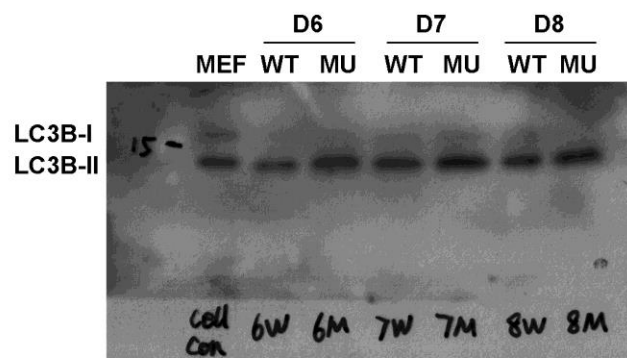

(for Figure 7a)

Supplementary Figure 7 Uncropped immunoblots used in the main figures.

**Supplementary Table 1** List of PCR primers used in this study

| <b>gene</b>     | <b>Forward(5'-3')</b>    | <b>Reverse(5'-3')</b>   |
|-----------------|--------------------------|-------------------------|
| <i>actb1</i>    | AGATCTTCACTCCCCTTGTTAC   | ATAGGAGTCTTTCTGTCCCATGC |
| <i>apoA1a</i>   | ACTCTTCTCTTGGCCTTGGG     | TCCAGGTTGTCAAGGGCTTT    |
| <i>atg16l1</i>  | AAACGTCACCGAGCAGACAG     | CGAGCTGAACGAATTCACGG    |
| <i>card9</i>    | GTTTGGTTATCAGACGCCGC     | TCTTGCGGTACACATCTGGG    |
| <i>cdh1</i>     | GGCTTGTGTAACAACCTGTGGG   | GCCACTGTGAAGGTGATTTTCG  |
| <i>cmlc2</i>    | TTGTTFCGACCCTAATGCCACA   | AAGCCTGGTCAACCTCTTCTG   |
| <i>cxcl8a</i>   | TGTTTTCTTGGCATTCTGACC    | TTTACAGTGTGGGCTTGGAGGG  |
| <i>fabp10a</i>  | AGAAGCTCAAGTGCATCGTCA    | CTGGATGTGGGAGAATCGGT    |
| <i>fabp2</i>    | GAAGTCAGCACTTTCCGCAC     | TGTGAAAGTCCCCTTGAGCG    |
| <i>gapdh</i>    | GTTGTGGAGTCTACTGGTGTCTT  | CAGTGCTCATAAGACCTTCAACG |
| <i>hnf4a</i>    | TACTAGGAGCTGCCAAACGC     | TTCTTACAGCCACACGGCTC    |
| <i>hp</i>       | CTGATGCTACAGCCTCTACGG    | GATGTGTTCTGGAAGCCTGGA   |
| <i>hspa5</i>    | TCTGTGCAGCAGGACATCAAA    | TTGGTCAAACCATGGCGGA     |
| <i>igfbp1a</i>  | TTGAAGAGAGGTGACCCGTG     | TTGGCTGTGGTTAGGCTCG     |
| <i>igfbp1b</i>  | CACCTGCTGAGCCTGAACAG     | GAGAAGCTCAGTGTGACACGG   |
| <i>il1b</i>     | GGCTGTGTGTTTGGGAATCT     | TGATAAACCAACCGGGACA     |
| <i>ins</i>      | CCCAAGAGAGACGTTGAGCC     | CAGCCACCTCAGTTTCTCTGG   |
| <i>irgm</i>     | TATCACCAAGGTGCTCGCTG     | AGCAGTGGAGACAACGAACT    |
| <i>lect2l</i>   | TGTGTGTAAGTATGATGGAGCCAC | CCGGACAAACGATCTGGCTT    |
| <i>mmp9</i>     | GCTCAACCACCGCAGACTAT     | GTGCTTCATTGCTGTTCCCG    |
| <i>mpx</i>      | CTACATGGCACAAACGCTGAG    | CTCGTCTTGAGTGAGCAGGTT   |
| <i>myhz1.1</i>  | GATGCTGTAAAGGCGTCCG      | CAGATCCTGCAGCCTGTTGA    |
| <i>nod2</i>     | GCAAGGAGGGGGTTGATTGT     | TCTGCATTCTTGCTGGCTCA    |
| <i>pax2a</i>    | CGTTTGTGACAACGACACAGT    | GCTGTGGAAAGAGGTGTTCCCT  |
| <i>slc15a1b</i> | TTGGTTCCCCATGGCAAAGT     | TCCAAAGCCCAGCTGCATAA    |
| <i>tnfa</i>     | CAGGGCAATCAACAAGATGG     | TGGTCCTGGTCATCTCTCCA    |
| <i>try</i>      | CGCCCAAATCAACAGCTACG     | AATGGGAGCATTACAGGCACA   |
| <i>ttc7a</i>    | GAGACTGCTGTGTCTCGTCTG    | ATGAACAACCTCCCCTGCCTG   |
| <i>vill</i>     | ACGCAGACTTCTGCATGTGA     | AGCAGGAACACATCGCCTTT    |
| <i>zo-1</i>     | GCTTACCTCACTGTGCGTCT     | AGGTAGTTGGGATCTCCGGG    |
| 23F             | GCATGCAGAGCGAGCAATAC     |                         |
| 24R             |                          | TCCAGCGCAATGTCTGGAAT    |
| 10F             | ACAGCTGAGCTCTGAGGAAC     |                         |
| 13R             |                          | CTGGGCATCACTGCAATAGC    |
| 15R             |                          | CACATTGAGGTACATGTCATGGG |
| 18R             |                          | CCCCATGTTTGAAGATGACAGG  |
| <i>hUVRAG</i>   | TGACAATTCGTTGCAGGCAG     | AGGCAACTTGACACCGCATA    |
| <i>hATG14</i>   | GCGTCTGGCAAATCTTCGAC     | TCTGAAGACACATCTGCGGG    |
| <i>hPIK3C3</i>  | GCTGTGCTGGATATTGCGTG     | AAGAGGCTTTGGATCCCGAC    |
| <i>hACTB</i>    | CCCAGAGCAAGAGAGG         | GTCCAGACGCAGGATG        |

**Supplementary Table 2** List of antibodies used in this study

| Antibody   | Host   | Clone  | Source         | Catalog No. | Dilution for IF     | Dilution for WB       |
|------------|--------|--------|----------------|-------------|---------------------|-----------------------|
| ATP1A1     | Rabbit |        | Cell Signaling | #3010       | 1:50(z)             |                       |
| beta-Actin | Mouse  | AC-15  | Sigma          | A5441       |                     | 1:1000(h)<br>1:400(z) |
| E-Cadherin | Mouse  |        | BD Biosciences | 610182      | 1:100(h)<br>1:50(z) | 1:1000(h)<br>1:200(z) |
| HSPA5      | Rabbit | C50B12 | Cell Signaling | #3177       | 1:50(z)             |                       |
| LAMP1      | Rabbit |        | Abcam          | ab24170     | 1:50(z)             |                       |
| LC3B       | Rabbit |        | Abcam          | ab51520     |                     | 1:1500(z)             |
| ZO-1       | Mouse  | 1A12   | Thermo Fisher  | 33-9100     | 1:100(h)<br>1:50(z) | 1:400(z)              |

Note: (z): zebrafish samples; (h): Caco2 samples.
